# Supplementary material for: Fatty acid binding profile of the liver X receptor α
Source: PubMed Central journal article supplement (PMC5282955; doi:10.1194/jlr.m072447), 2017-01-31
Supplement: 10.1194_M072447_jlr.M072447-1.pdf [file 10.1194_M072447_jlr.M072447-1.pdf]

### Supplementary Figures:

**Table 1.** Affinity of hLXR $\alpha$  for non-fluorescent ligands determined by quenching of hLXR $\alpha$  aromatic amino acid fluorescence ( $K_d$ ) and ligand efficiencies determined by displacement of hLXR $\alpha$ -bound BODIPY C16-CoA ( $K_i$ ).

| Ligand                    | Chain length:<br>double bonds<br>(position) | $K_d$ (nM)   | $K_i$ (nM)    |
|---------------------------|---------------------------------------------|--------------|---------------|
| Palmitoleic acid          | C16:1 (n-7)                                 | 113 $\pm$ 64 | N.D.          |
| Palmitoleoyl-CoA          | C16:1 (n-7)                                 | 46 $\pm$ 16  | N.D.          |
| Stearic acid              | C18:0                                       | 25 $\pm$ 7   | N.D.          |
| Stearoyl-CoA              | C18:0                                       | >197         | N.D.          |
| Oleic acid                | C18:1 (n-9)                                 | 45 $\pm$ 15  | N.D.          |
| Oleoyl-CoA                | C18:1 (n-9)                                 | >68          | N.D.          |
| Linoleic acid             | C18:2(n-6)                                  | 21 $\pm$ 7   | N.D.          |
| Linoleoyl-CoA             | C18:2(n-6)                                  | >61          | N.D.          |
| Arachidonic acid          | C20:4 (n-6)                                 | 31 $\pm$ 9   | N.D.          |
| Arachidonoyl-CoA          | C20:4 (n-6)                                 | 20 $\pm$ 9   | N.D.          |
| Docosahexanoic acid       | C22:6                                       | >80          | N.D.          |
| Docosahexaenoyl-CoA       | C22:6                                       | 25 $\pm$ 3   | N.D.          |
| 22 (R) Hydroxycholesterol |                                             | N.D.         | 1.2 $\pm$ 0.3 |
| 25-Hydroxycholesterol     |                                             | 17 $\pm$ 4   | N.D.          |

Values represent the mean  $\pm$  S.E. ( $n \geq 3$ ). ND, not determined.

**Table 2.** Secondary structures of hLXR $\alpha$  protein in the presence of fatty acids and fatty acyl-CoAs

| Ligand                          | $\alpha$ -helix regular<br>H(r)% | $\alpha$ -helix distort<br>H(d)% | $\beta$ -sheet regular<br>S(r)% | $\beta$ -sheet distort<br>S(d)% | Turns<br>T%     | Unordered<br>U% |
|---------------------------------|----------------------------------|----------------------------------|---------------------------------|---------------------------------|-----------------|-----------------|
| Ethanol                         | 13.9 $\pm$ 0.4                   | 11.9 $\pm$ 0.2                   | 13.3 $\pm$ 0.3                  | 8.8 $\pm$ 0                     | 19.6 $\pm$ 0.8  | 32.4 $\pm$ 1.5  |
| C16:1                           | 14.0 $\pm$ 1.0                   | 11.3 $\pm$ 0.9                   | 17.0 $\pm$ 3                    | 10.1 $\pm$ 0.9                  | 20.9 $\pm$ 0.5* | 26.5 $\pm$ 2.4  |
| C16:1-CoA                       | 14.3 $\pm$ 0.6                   | 11.6 $\pm$ 0.6                   | 13.7 $\pm$ 1.4                  | 9.3 $\pm$ 0.3                   | 20.6 $\pm$ 0.6  | 30.2 $\pm$ 1.1  |
| C18:0                           | 16.4 $\pm$ 3.2                   | 11.7 $\pm$ 0.8                   | 10.1 $\pm$ 5.1                  | 9.2 $\pm$ 0.4                   | 16.9 $\pm$ 3.4  | 35.4 $\pm$ 4.8  |
| C18:0-CoA                       | 10.3 $\pm$ 1.3                   | 9.7 $\pm$ 0.7                    | 19.0 $\pm$ 2.4                  | 10.4 $\pm$ 0.5                  | 20.1 $\pm$ 1.1  | 30.4 $\pm$ 2.0  |
| C18:1                           | 14.0 $\pm$ 1                     | 11.3 $\pm$ 0.9                   | 17.0 $\pm$ 3                    | 10.1 $\pm$ 0.9                  | 20.9 $\pm$ 0.5  | 26.6 $\pm$ 2.4  |
| C18:1-CoA                       | 14.0 $\pm$ 0.2                   | 10.9 $\pm$ 0.8                   | 12.0 $\pm$ 6                    | 9.0 $\pm$ 0.1                   | 18.9 $\pm$ 0.2  | 35.2 $\pm$ 0.6  |
| C18:2                           | 14.1 $\pm$ 1.1                   | 11.6 $\pm$ 1.2                   | 15.0 $\pm$ 2                    | 9.4 $\pm$ 1.1                   | 20.9 $\pm$ 1.1  | 28.9 $\pm$ 1.3  |
| C18:2-CoA                       | 7.4 $\pm$ 0.3                    | 8.5 $\pm$ 0.1                    | 28.2 $\pm$ 9.8                  | 10.8 $\pm$ 0.1                  | 25.4 $\pm$ 0.4  | 19.4 $\pm$ 9.7  |
| C20:4                           | 13.2 $\pm$ 0.2                   | 10.3 $\pm$ 0.1                   | 16.1 $\pm$ 2.9                  | 10.1 $\pm$ 0.1                  | 21.3 $\pm$ 0.5  | 28.7 $\pm$ 0.2  |
| C20:4-CoA                       | 13.9 $\pm$ 0.6                   | 12.1 $\pm$ 0.3                   | 14.21 $\pm$ 0.9                 | 8.9 $\pm$ 0.2                   | 20.9 $\pm$ 0.3  | 30.0 $\pm$ 0.5  |
| C20:5                           | 13.1 $\pm$ 0.1                   | 11.6 $\pm$ 0.2                   | 14.8 $\pm$ 0.8*                 | 9.1 $\pm$ 0.1                   | 20.8 $\pm$ 0.1  | 30.5 $\pm$ 0.7  |
| C22:5                           | 15.7 $\pm$ 1.9                   | 12.2 $\pm$ 0.4                   | 10.1 $\pm$ 4                    | 8.3 $\pm$ 0.6                   | 19.8 $\pm$ 1.5  | 33.8 $\pm$ 4    |
| C22:6                           | 15.6 $\pm$ 1.1                   | 12.2 $\pm$ 1                     | 14 $\pm$ 3                      | 9.5 $\pm$ 0.8                   | 21 $\pm$ 0.4    | 27.5 $\pm$ 1.8  |
| KH <sub>2</sub> PO <sub>4</sub> | 12.3 $\pm$ 0.1                   | 9.8 $\pm$ 0.3                    | 16.5 $\pm$ 1.8                  | 9.7 $\pm$ 0.3                   | 19.2 $\pm$ 0.3  | 32.4 $\pm$ 0.7  |
| C20:5-CoA                       | 14.2 $\pm$ 0.7                   | 12 $\pm$ 0.5                     | 14 $\pm$ 0.1                    | 8.8 $\pm$ 0.4                   | 21.1 $\pm$ 0.5  | 29.9 $\pm$ 0.1  |
| C22:5-CoA                       | 13.4 $\pm$ 1.1                   | 11.6 $\pm$ 0.5                   | 14.9 $\pm$ 1.7                  | 9.2 $\pm$ 0.3                   | 20.6 $\pm$ 0.6  | 30.2 $\pm$ 1.1  |
| C22:6-CoA                       | 14.3 $\pm$ 0.4                   | 12.4 $\pm$ 0.2                   | 13.2 $\pm$ 0.8                  | 8.5 $\pm$ 0.1                   | 20.6 $\pm$ 0.5  | 30.9 $\pm$ 0.9  |

Significant difference between hLXR $\alpha$  with solvent compared to the absence or presence of fatty acids or fatty acyl-CoA dissolved in either ethanol or in KH<sub>2</sub>PO<sub>4</sub> were determined by t-test \* = P<0.05, \*\* = P<0.01, \*\*\* = P<0.001.

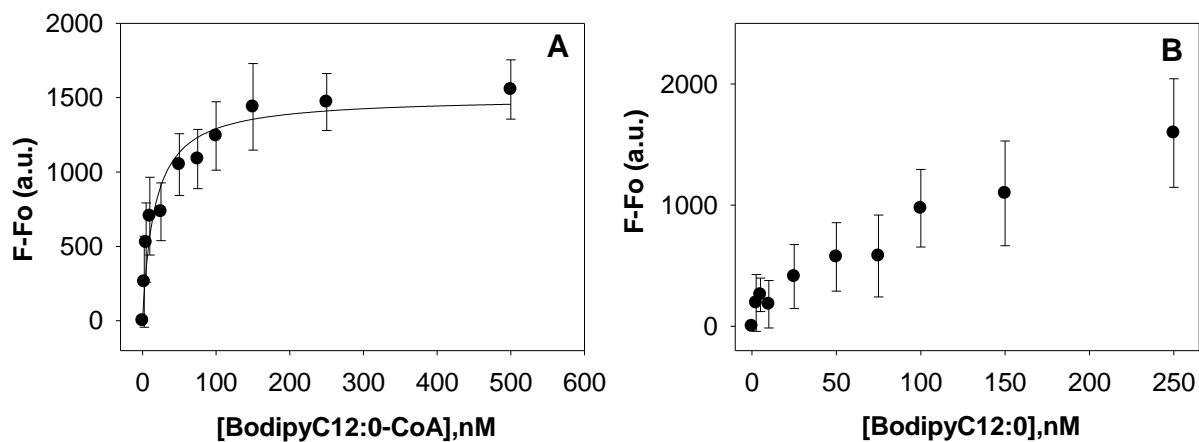

**Fig. 1:** Forster resonance energy transfer (FRET). Unlabeled LXRα (donor) (excitation wavelength 280 nm) was titrated against increasing concentrations of BODIPY C12:0 or BODIPY C12:0-CoA (acceptor) (emission wavelength 300-540 nm). Changes in the fluorescence intensity at 341 nm wavelength were plotted as a function of ligand conc. to determine apparent dissociation constant ( $K_d$ ) values.

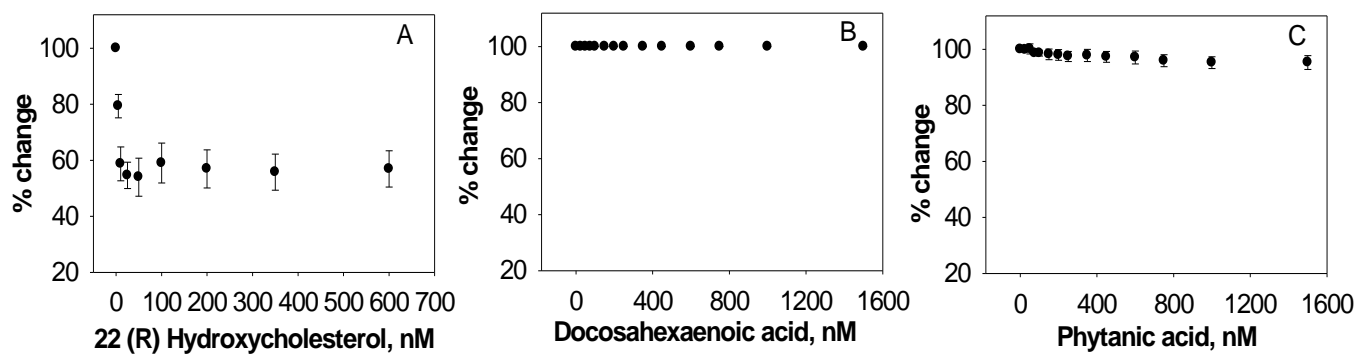

**Fig. 2:** Displacement assay of BODIPY C16:0-CoA bound LXR $\alpha$ . BODIPY C16:0-CoA bound to LXR $\alpha$  was displaced with LXR $\alpha$  endogenous ligand 22 (R) Hydroxycholesterol, but not with long chain fatty acids docosahexaenoic acid and phytanic acid.

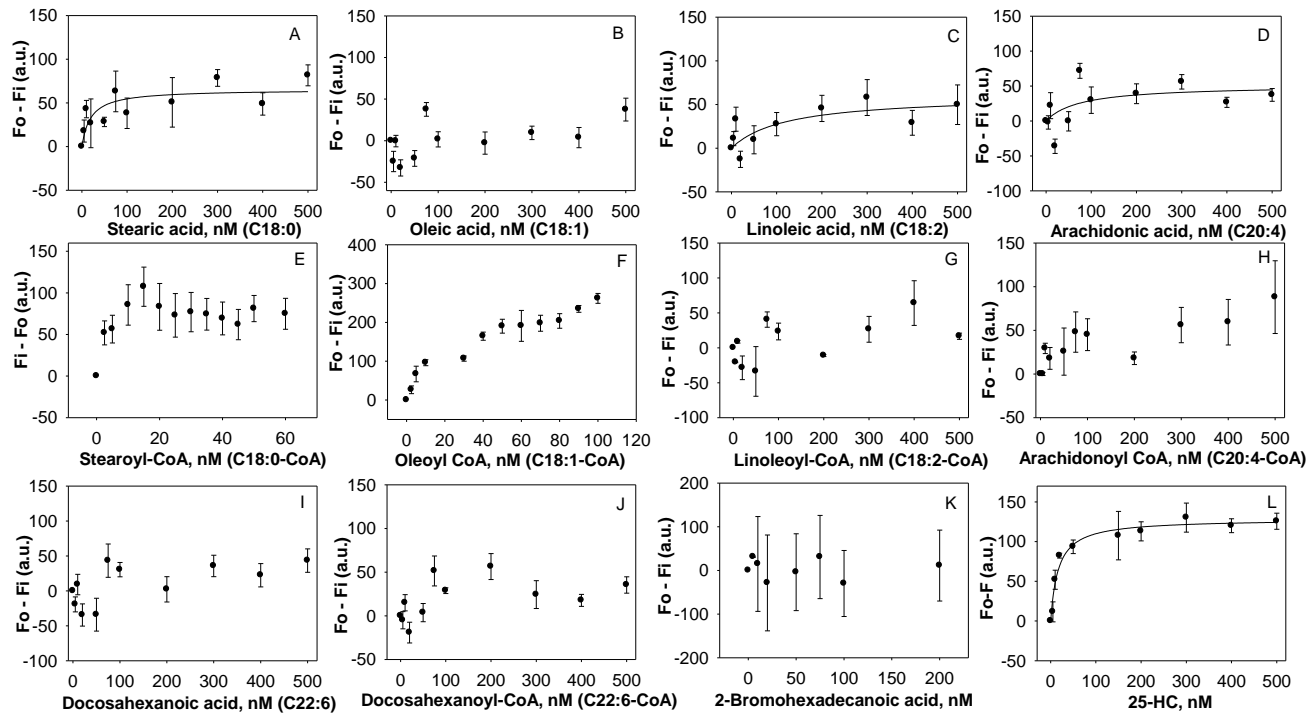

**Fig. 3:** Direct binding assay based on quenching of LXR $\alpha$  aromatic amino acid fluorescence emission when titrated with the following ligands (A) Stearic acid, (B) Oleic acid, (C) Linoleic acid, (D) Arachidonic acid, (E) Stearoyl-CoA, (F) Oleoyl-CoA, (G) Linoleoyl-CoA, (H) Arachidonoyl-CoA, (I) Docosahexanoic acid, (J) Docosahexanoyl-CoA, (K) 2-Bromohexadecanoic acid, and (L) 25-Hydroxycholesterol

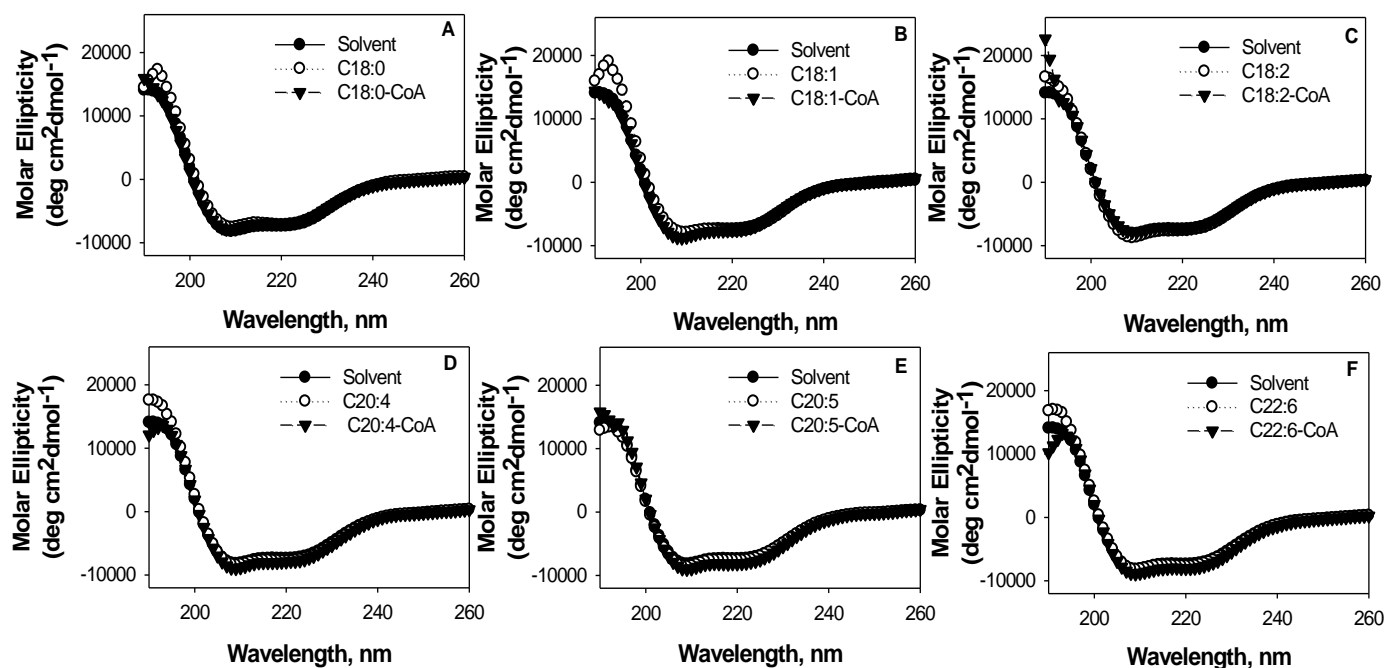

**Fig. 4:** Far UV circular dichroic spectra of LXR $\alpha$  in the absence (filled circles) and presence of added ligand: **(A)** C18:0 FA (open circles) or C18:0-CoA (filled triangles); **(B)** C18:1 FA (open circles) or C18:1-CoA (filled triangles); **(C)** C18:2 FA (open circles) or C18:2-CoA (filled triangles); **(D)** C20:4 FA (open circles) or C20:4-CoA (filled triangles); **(E)** C20:5 FA (open circles) or C20:5-CoA (filled triangles), and **(F)** C22:6 FA (open circles) or C22:6-CoA (filled triangles). Each spectrum represents an average of 10 scans for a given representative spectrum from at least three replicates.
